# Supplementary material for: COVID-19 and Clostridioides difficile Coinfection Outcomes among Hospitalized Patients in the United States: An Insight from National Inpatient Database
Source: MDPI journal article supplement (doi:10.3390/idr15030028), 2023-05-19
Supplement: s1 [file s1]

**Table S1.** ICD codes.

| <b>Diagnosis</b>                          | <b>ICD-10 code</b>                                                                                                                                                                                                        |
|-------------------------------------------|---------------------------------------------------------------------------------------------------------------------------------------------------------------------------------------------------------------------------|
| COVID 19                                  | U071, U00, U49, U50, U85, J1282                                                                                                                                                                                           |
| Mechanical ventilation                    | 5A1945Z,5A1955Z,5A1935Z,5A09357,5A09457,5A09557                                                                                                                                                                           |
| vasopressor                               | 3E030XZ,3E033XZ,3E040XZ,3E043XZ,3E050XZ,3E053XZ,3E060XZ,3E063XZ                                                                                                                                                           |
| Sudden cardiac arrest                     | I46, I97                                                                                                                                                                                                                  |
| Acute kidney injury and hemodialysis      | N17,<br>N990,5A1D70Z,5A1D90Z,5A1D80Z,5A1D00Z,5A1D60Z                                                                                                                                                                      |
| Cardiogenic Shock                         | R570                                                                                                                                                                                                                      |
| Mechanical Circulatory Support            | 5A02110, 5A02210, 5A0211D, 02HA3RZ,<br>5A02116, 5A0221D, 5A1522F, 5A1522G,<br>5A1522H, 5A15A2F, 5A15A2G, 5A15A2H,<br>5A15223                                                                                              |
| Chronic kidney disease                    | N181, N182, N1830, N1831, N1832,<br>N184,N185,N189                                                                                                                                                                        |
| Pulmonary Circulation Disorder            | Data Obtained from elixhauser comorbidity index                                                                                                                                                                           |
| Chronic Pulmonary Disease                 |                                                                                                                                                                                                                           |
| Diabetes Uncomplicated                    |                                                                                                                                                                                                                           |
| Diabetes Complicated                      |                                                                                                                                                                                                                           |
| Hypothyroidism                            |                                                                                                                                                                                                                           |
| Peptic Ulcer Disease (excluding bleeding) |                                                                                                                                                                                                                           |
| Lymphoma                                  |                                                                                                                                                                                                                           |
| Metastatic Cancer                         |                                                                                                                                                                                                                           |
| Solid Tumor Without Metastasis            |                                                                                                                                                                                                                           |
| Rheumatoid Arthritis/Collagen Vascular    |                                                                                                                                                                                                                           |
| Obesity                                   |                                                                                                                                                                                                                           |
| Drug Abuse                                |                                                                                                                                                                                                                           |
| Hypertension                              |                                                                                                                                                                                                                           |
| Peripheral arterial disease               |                                                                                                                                                                                                                           |
| Obstructive sleep apnea                   |                                                                                                                                                                                                                           |
| Liver Disease                             |                                                                                                                                                                                                                           |
| Alcohol                                   |                                                                                                                                                                                                                           |
| Smoking                                   | F17, F172, F1720, F17200, F17201, F17203,<br>F17208, F17209, F1721, F17210, F17211, F17213,<br>F17218, F17219, F1722, F17220, F17221, F17223,<br>F17228, F17229, F1729, F17290, F17291, F17293,<br>F17298, F17299, Z87891 |
| History of PCI <sup>1</sup>               | Z986, Z9861, Z9862                                                                                                                                                                                                        |
| History of CABG <sup>2</sup>              | Z951                                                                                                                                                                                                                      |
| Previous myocardial infarction            | I252                                                                                                                                                                                                                      |

|                                 |                                                                                                                                                                                                                                                                                                                                  |
|---------------------------------|----------------------------------------------------------------------------------------------------------------------------------------------------------------------------------------------------------------------------------------------------------------------------------------------------------------------------------|
| Coronary artery disease         | I2510, I25111, I25118, I25119, I252, I253, I254, I2541, I2542, I255, I256, I257, I2570, I25700, I25701, I25708, I25709, I2571, I25710, I25711, I25718, I25719, I2572, I25720, I25721, I25728, I25729, I2573, I25730, I25731, I25738, I25739, I2575, I25750, I25751, I25758, I25759, I2576, I25760, I25761, I25768, I25769, A04.7 |
| Clostridium difficile infection | A04.7                                                                                                                                                                                                                                                                                                                            |
| Fluid & electrolyte disturbance | E87.0 - E87.8                                                                                                                                                                                                                                                                                                                    |
| Acute kidney injury             | N17.9, N19                                                                                                                                                                                                                                                                                                                       |
| Septic shock                    | R65.21                                                                                                                                                                                                                                                                                                                           |
| Ileus                           | K56.0, K56.7                                                                                                                                                                                                                                                                                                                     |
| Ascites                         | R18.8                                                                                                                                                                                                                                                                                                                            |
| Hypoalbuminemia                 | E88.09                                                                                                                                                                                                                                                                                                                           |
| Peritonitis                     | K67, K65.0 - K65.2                                                                                                                                                                                                                                                                                                               |
| Perforation of intestine        | K63.1                                                                                                                                                                                                                                                                                                                            |
| Toxic megacolon                 | K52.1                                                                                                                                                                                                                                                                                                                            |

---

<sup>1</sup>Percutaneous coronary intervention; <sup>2</sup>Coronary artery bypass graft

**Figure S1.** Secondary analysis with propensity matching in COVID-19 patients with and without Clostridium Difficile infection.

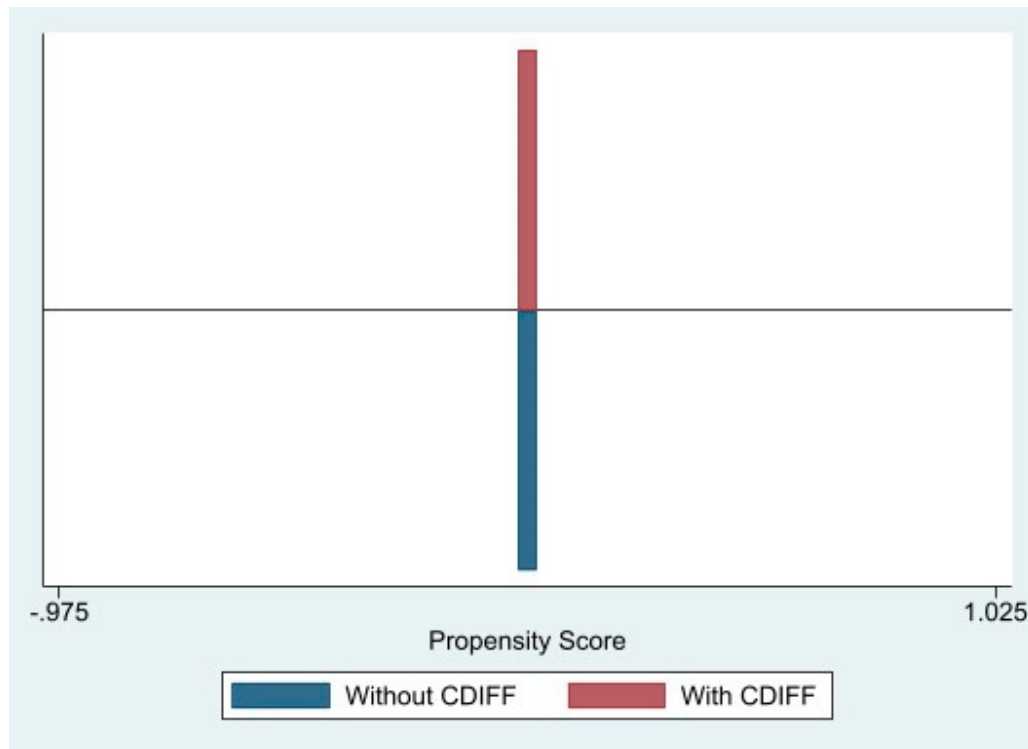

Baseline demographics (Age, race, sex, income status, and insurance status) were matched using a 1:1 nearest neighbor propensity score with 0.05 caliper width in matched cohort, and a secondary multivariate regression model was built

**Table S2.** 1:1 Propensity matched variables in COVID-19 positive patients with and without Clostridium Difficile infection: Patient-level characteristics (Age, sex, race, income and insurance status).

| CHARACTERISTICS            | COVID-19 patients<br>with Clostridium<br>Difficile infection | COVID-19 patients<br>without Clostridium<br>Difficile infection | P value |
|----------------------------|--------------------------------------------------------------|-----------------------------------------------------------------|---------|
| N=8170                     | N=10,020                                                     | N=10,020                                                        |         |
| Sex (Female)               | 53.19%                                                       | 53.14%                                                          | 0.97    |
| Mean age years (SD)        |                                                              |                                                                 | 0.99    |
| Male                       | 68.02(11.06)                                                 | 68.04(11.06)                                                    |         |
| Female                     | 70.7(11.11)                                                  | 70.7(11.14)                                                     |         |
| AGE GROUPS                 |                                                              |                                                                 | 0.99    |
| ≥18–29                     | 1.55%                                                        | 1.6%                                                            |         |
| 30–49                      | 8.43%                                                        | 8.43%                                                           |         |
| 50–69                      | 33.53%                                                       | 33.38%                                                          |         |
| ≥70                        | 56.49%                                                       | 56.59%                                                          |         |
| RACE                       |                                                              |                                                                 | 0.99    |
| Caucasians                 | 59.93%                                                       | 60.08%                                                          |         |
| African American           | 20.66%                                                       | 20.71%                                                          |         |
| Hispanics                  | 13.32%                                                       | 13.32%                                                          |         |
| Asian or Pacific Islander  | 2.05%                                                        | 2%                                                              |         |
| Native American            | 1%                                                           | 0.85%                                                           |         |
| Others                     | 3.04%                                                        | 3.04%                                                           |         |
| MEDIAN HOUSEHOLD<br>INCOME |                                                              |                                                                 | 0.99    |
| <49,999\$                  | 31.29%                                                       | 31.44%                                                          |         |
| 50,000–64,999\$            | 28.34%                                                       | 28.29%                                                          |         |
| 65,000–85,999\$            | 23.9%                                                        | 23.9%                                                           |         |
| >86,000\$                  | 16.47%                                                       | 16.37%                                                          |         |
| INSURANCE STATUS           |                                                              |                                                                 | 1       |
| Medicare                   | 72.51%                                                       | 72.55%                                                          |         |
| Medicaid                   | 11.73%                                                       | 11.68%                                                          |         |
| Private                    | 14.42%                                                       | 14.42%                                                          |         |
| Self-pay                   | 1.35%                                                        | 1.35%                                                           |         |
